# Supplementary material
Source: MDPI journal article supplement (https://www.mdpi.com/2071-1050/11/11/3121)
Supplement: s1 [file s1]

*Table S1. Sample of documents obtained with H-Classic methodology.*

| Order | Title                                                                                                     | Auhors                                      | Year | Cites<br>Jun-<br>2016 | Cites Dec-<br>2018 | UC<br>180d | UC from<br>2013 | Increase | %       |
|-------|-----------------------------------------------------------------------------------------------------------|---------------------------------------------|------|-----------------------|--------------------|------------|-----------------|----------|---------|
| 1     | Social structure and competition in interfirm networks: The paradox of embeddedness                       | Uzzi, B                                     | 1997 | 2602                  | 3781               | 41         | 563             | 1179     | 45,31%  |
| 2     | The promise of entrepreneurship as a field of research                                                    | Shane, S,<br>Venkataraman, S                | 2000 | 2090                  | 3741               | 64         | 960             | 1651     | 79,00%  |
| 3     | Clarifying the entrepreneurial orientation construct and linking it to performance                        | Lumpkin, GT,<br>Dess, GG                    | 1996 | 1419                  | 2599               | 35         | 610             | 1180     | 83,16%  |
| 4     | Explicating dynamic capabilities: The nature and microfoundations of (sustainable) enterprise performance | Teece, DJ                                   | 2007 | 1124                  | 2498               | 124        | 1548            | 1374     | 122,24% |
| 5     | Market orientation and the learning organization                                                          | Slater, SF, Narver<br>JC                    | 1995 | 1115                  | 1675               | 16         | 421             | 560      | 50,22%  |
| 6     | From managerialism to entrepreneurialism - the transformation in urban governance in late capitalism      | Harvey, D                                   | 1989 | 1078                  | 1778               | 8          | 177             | 700      | 64,94%  |
| 7     | Prior knowledge and the discovery of entrepreneurial opportunities                                        | Shane, S                                    | 2000 | 1020                  | 1573               | 65         | 599             | 553      | 54,22%  |
| 8     | Corporate culture, customer orientation, and innovativeness in japanese firms - a quadrad analysis        | Deshpande, R,<br>Farley, JU,<br>Webster, FE | 1993 | 961                   | 1551               | 20         | 346             | 590      | 61,39%  |
| 9     | Entrepreneurship - productive, unproductive, and destructive                                              | Baumol, WJ                                  | 1990 | 888                   | 1427               | 17         | 219             | 539      | 60,70%  |
| 10    | Fools rush in - the institutional context of industry creation                                            | Fiol, CM, Aldrich,<br>HE                    | 1994 | 854                   | 1289               | 8          | 223             | 435      | 50,94%  |
| 11    | The correlates of entrepreneurship in 3 types of firms                                                    | Miller, D                                   | 1983 | 852                   | 1551               | 13         | 172             | 699      | 82,04%  |
| 12    | Network dyads in entrepreneurial settings - a study of the governance of exchange relationships           | Larson, A                                   | 1992 | 840                   | 1141               | 17         | 160             | 301      | 35,83%  |

|    |                                                                                                                   |                                      |      |     |      |    |     |     |         |
|----|-------------------------------------------------------------------------------------------------------------------|--------------------------------------|------|-----|------|----|-----|-----|---------|
| 13 | Toward a theory of international new ventures                                                                     | McDougall, PP, Oviatt, BM            | 1994 | 830 | 1459 | 16 | 258 | 629 | 75,78%  |
| 14 | Value creation in e-business                                                                                      | Amit, R, Zott, C                     | 2001 | 785 | 1389 | 91 | 972 | 604 | 76,94%  |
| 15 | Interorganizational endorsements and the performance of entrepreneurial ventures                                  | Hoang, H, Hybels, RC, Stuart, T      | 1999 | 759 | 1054 | 18 | 268 | 295 | 38,87%  |
| 16 | The role of social and human capital among nascent entrepreneurs                                                  | Davidsson, P, Honig, B               | 2003 | 755 | 1393 | 64 | 653 | 638 | 84,50%  |
| 17 | Resource-based view of strategic alliance formation: Strategic and social effects in entrepreneurial firms        | Eisenhardt, KM, Schoonhoven, CB      | 1996 | 747 | 1058 | 31 | 419 | 311 | 41,63%  |
| 18 | An estimated model of entrepreneurial choice under liquidity constraints                                          | Evans, DS, Jovanovic, B              | 1989 | 722 | 952  | 2  | 50  | 230 | 31,86%  |
| 19 | Social capital, knowledge acquisition, and knowledge exploitation in young technology-based firms                 | Yli-Renko, H, Autio, E, Sapienza, HJ | 2001 | 707 | 1103 | 39 | 511 | 396 | 56,01%  |
| 20 | Some empirical aspects of entrepreneurship                                                                        | Evans, DS, Leighton, LS              | 1989 | 706 | 932  | 6  | 121 | 226 | 32,01%  |
| 21 | Institutional transitions and strategic choices                                                                   | Peng, MW                             | 2003 | 702 | 1153 | 17 | 356 | 451 | 64,25%  |
| 22 | Entrepreneurial discovery and the competitive market process: An Austrian approach                                | Kirzner, IM                          | 1997 | 691 | 1143 | 3  | 100 | 452 | 65,41%  |
| 23 | Culture and cognition                                                                                             | DiMaggio, P                          | 1997 | 686 | 974  | 19 | 283 | 288 | 41,98%  |
| 24 | Causation and effectuation: Toward a theoretical shift from economic inevitability to entrepreneurial contingency | Sarasvathy, SD                       | 2001 | 673 | 1357 | 30 | 372 | 684 | 101,63% |
| 25 | Effects of age at entry, knowledge intensity, and imitability on international growth                             | Autio, E, Sapienza, HJ, Almeida, JG  | 2000 | 668 | 1090 | 12 | 202 | 422 | 63,17%  |
| 26 | What makes an entrepreneur?                                                                                       | Blanchflower, DG, Oswald, AJ         | 1998 | 567 | 796  | 9  | 259 | 229 | 40,39%  |

|    |                                                                                                                           |                                           |      |     |      |    |     |     |         |
|----|---------------------------------------------------------------------------------------------------------------------------|-------------------------------------------|------|-----|------|----|-----|-----|---------|
| 27 | Differences between entrepreneurs and managers in large organizations: Biases and heuristics in strategic decision-making | Busenitz, LW, Barney, JB                  | 1997 | 567 | 897  | 27 | 399 | 330 | 58,20%  |
| 28 | Shaping agility through digital options: Reconceptualizing the role of information technology in contemporary firms       | Sambamurthy, V, Bharadwaj, A, Grover, V   | 2003 | 557 | 851  | 31 | 337 | 294 | 52,78%  |
| 29 | Occupational choice and the process of development                                                                        | Banerjee, AV, Newman, AF                  | 1993 | 555 | 728  | 0  | 44  | 173 | 31,17%  |
| 30 | A paradigm of entrepreneurship - entrepreneurial management                                                               | Jarillo, JC, Stevenson, H                 | 1990 | 531 | 893  | 7  | 144 | 362 | 68,17%  |
| 31 | Innovation in conservative and entrepreneurial firms - 2 models of strategic momentum                                     | Miller, D, Friesen, PH                    | 1982 | 530 | 866  | 10 | 94  | 336 | 63,40%  |
| 32 | Finance, entrepreneurship, and growth - theory and evidence                                                               | King, RG, Levine, R                       | 1993 | 527 | 827  | 15 | 192 | 300 | 56,93%  |
| 33 | Entrepreneurship in the large corporation: A longitudinal study of how established firms create breakthrough inventions   | Ahuja, G, Lampert, CM                     | 2001 | 524 | 779  | 40 | 419 | 255 | 48,66%  |
| 34 | Survival of the fittest? Entrepreneurial human capital and the persistence of underperforming firms                       | Gimeno, J, Folta, TB, Cooper, AC, Woo, CY | 1997 | 522 | 784  | 10 | 205 | 262 | 50,19%  |
| 35 | Initial human and financial capital as predictors of new venture performance                                              | Gimeno, J, Cooper, AC, Woo, CY            | 1994 | 489 | 817  | 15 | 273 | 328 | 67,08%  |
| 36 | Creating something from nothing: Resource construction through entrepreneurial bricolage                                  | Baker, T, Nelson, RE                      | 2005 | 475 | 919  | 29 | 331 | 444 | 93,47%  |
| 37 | Competing models of entrepreneurial intentions                                                                            | Krueger, NF, Reilly, MD, Carsrud, AL      | 2000 | 475 | 1112 | 84 | 887 | 637 | 134,11% |

|    |                                                                                                                     |                                                   |      |     |     |    |     |     |         |
|----|---------------------------------------------------------------------------------------------------------------------|---------------------------------------------------|------|-----|-----|----|-----|-----|---------|
| 38 | Internal capabilities, external networks, and performance: A study on technology-based ventures                     | Lee, C, Lee, K, Pennings, JM                      | 2001 | 461 | 758 | 29 | 520 | 297 | 64,43%  |
| 39 | The internationalization and performance of SMEs                                                                    | Lu, JW, Beamish, PW                               | 2001 | 457 | 773 | 23 | 451 | 316 | 69,15%  |
| 40 | Network-based research in entrepreneurship - A critical review                                                      | Hoang, H, Antoncic, B                             | 2003 | 444 | 808 | 29 | 325 | 364 | 81,98%  |
| 41 | Innovation, organizational capabilities, and the born-global firm                                                   | Knight, GA, Cavusgil, ST                          | 2004 | 441 | 884 | 41 | 488 | 443 | 100,45% |
| 42 | Institutional entrepreneurship in mature fields: The big five accounting firms                                      | Greenwood, R, Suddaby, R                          | 2006 | 440 | 725 | 17 | 333 | 285 | 64,77%  |
| 43 | Entrepreneurship - past research and future challenges                                                              | Low, MB, Macmillan, IC                            | 1988 | 439 | 700 | 8  | 113 | 261 | 59,45%  |
| 44 | An incomplete contracts approach to financial contracting                                                           | Aghion, P, Bolton, P                              | 1992 | 425 | 571 | 3  | 46  | 146 | 34,35%  |
| 45 | The future of the university and the university of the future: evolution of ivory tower to entrepreneurial paradigm | Etzkowitz, H, Webster, A, Gebhardt, C, Terra, BRC | 2000 | 415 | 788 | 22 | 261 | 373 | 89,88%  |
| 46 | Institutional entrepreneurship in emerging fields: HIV/AIDS treatment advocacy in Canada                            | Maguire, S, Hardy, C, Lawrence, TB                | 2004 | 411 | 681 | 14 | 181 | 270 | 65,69%  |
| 47 | Interfirm cooperation and startup innovation in the biotechnology industry                                          | SHAN, WJ, WALKER, G, Kogut, B                     | 1994 | 411 | 541 | 13 | 147 | 130 | 31,63%  |
| 48 | Organizational dynamics of market transition - hybrid forms, property-rights, and mixed economy in china            | Nee, V                                            | 1992 | 411 | 540 | 8  | 66  | 129 | 31,39%  |
| 49 | A theory of entrepreneurial opportunity identification and development                                              | Ardichvili, A, Cardozo, R, Ray, S                 | 2003 | 405 | 800 | 21 | 311 | 395 | 97,53%  |

|    |                                                                                                                                       |                                     |      |     |     |    |     |     |        |
|----|---------------------------------------------------------------------------------------------------------------------------------------|-------------------------------------|------|-----|-----|----|-----|-----|--------|
| 50 | Linking two dimensions of entrepreneurial orientation to firm performance: The moderating role of environment and industry life cycle | Lumpkin, GT, Dess, GG               | 2001 | 395 | 779 | 17 | 295 | 384 | 97,22% |
| 51 | The ambidextrous organisation                                                                                                         | O'Reilly, CA, Tushman, ML           | 2004 | 393 | 667 | 26 | 381 | 274 | 69,72% |
| 52 | Cultural entrepreneurship: Stories, legitimacy, and the acquisition of resources                                                      | Lounsbury, M, Glynn, MA             | 2001 | 392 | 659 | 19 | 372 | 267 | 68,11% |
| 53 | Knowledge-based resources, entrepreneurial orientation, and the performance of small and medium-sized businesses                      | Wiklund, J, Shepherd, D             | 2003 | 388 | 738 | 12 | 290 | 350 | 90,21% |
| 54 | General equilibrium entrepreneurial theory of firm formation based on risk aversion                                                   | KIHLSTROM, RE, LAFFONT, JJ          | 1979 | 383 | 525 | 0  | 21  | 142 | 37,08% |
| 55 | Contextual influences on the corporate entrepreneurship performance relationship - a longitudinal analysis                            | Zahra, SA, Covin, JG                | 1995 | 382 | 672 | 14 | 207 | 290 | 75,92% |
| 56 | Explaining the formation of international new ventures - the limits of theories from international-business research                  | Shane, S, McDougall, PP, Oviatt, BM | 1994 | 380 | 610 | 15 | 276 | 230 | 60,53% |
| 57 | Financial contracting theory meets the real world: An empirical analysis of venture capital contracts                                 | Kaplan, SN, Stromberg, P            | 2003 | 374 | 523 | 8  | 109 | 149 | 39,84% |
| 58 | Organizational endowments and the performance of university start-ups                                                                 | Shane, S, Stuart, T                 | 2002 | 374 | 550 | 19 | 214 | 176 | 47,06% |
| 59 | The entrepreneurship of resource-based theory                                                                                         | Busenitz, LW, Alvarez, SA           | 2001 | 372 | 656 | 16 | 254 | 284 | 76,34% |
| 60 | Does entrepreneurship pay? An empirical analysis of the                                                                               | Hamilton, BH                        | 2000 | 372 | 568 | 6  | 80  | 196 | 52,69% |

returns to self-employment

|    |                                                                                                                                               |                                          |      |     |     |    |     |     |         |
|----|-----------------------------------------------------------------------------------------------------------------------------------------------|------------------------------------------|------|-----|-----|----|-----|-----|---------|
| 61 | Does entrepreneurial self-efficacy distinguish entrepreneurs from managers?                                                                   | Chen, CC, Greene, PG, Crick, A           | 1998 | 372 | 741 | 45 | 441 | 369 | 99,19%  |
| 62 | Entrepreneurial action and the role of uncertainty in the theory of the entrepreneur                                                          | Shepherd, D, McMullen, JS                | 2006 | 371 | 708 | 19 | 301 | 337 | 90,84%  |
| 63 | Assessing the impact of organizational practices on the relative productivity of university technology transfer offices: an exploratory study | Siegel, DS, Waldman, D, Link, A          | 2003 | 365 | 588 | 16 | 224 | 223 | 61,10%  |
| 64 | Entrepreneurship and dynamic capabilities: A review, model and research agenda                                                                | Davidsson, P, Sapienza, HJ, Zahra, SA    | 2006 | 363 | 740 | 33 | 556 | 377 | 103,86% |
| 65 | The evolution of firm networks: From emergence to early growth of the firm                                                                    | Hite, JM, Hesterly, WS                   | 2001 | 363 | 569 | 14 | 201 | 206 | 56,75%  |
| 66 | Bricolage versus breakthrough: distributed and embedded agency in technology entrepreneurship                                                 | Garud, R, Karnoe, P                      | 2003 | 356 | 585 | 5  | 181 | 229 | 64,33%  |
| 67 | Linking entrepreneurship and economic growth                                                                                                  | Wennekers, S, Thurik, R                  | 1999 | 356 | 644 | 3  | 157 | 288 | 80,90%  |
| 68 | Social and commercial entrepreneurship: Same, different, or both?                                                                             | Austin, J, Stevenson, H, Wei-Skillern, J | 2006 | 354 | 868 | 36 | 335 | 514 | 145,20% |
| 69 | International entrepreneurship: The intersection of two research paths                                                                        | McDougall, PP, Oviatt, BM                | 2000 | 354 | 640 | 15 | 164 | 286 | 80,79%  |
| 70 | Benchmarking the firms critical success factors in new product development                                                                    | COOPER, RG, KLEINSCHMIDT, EJ             | 1995 | 351 | 501 | 19 | 327 | 150 | 42,74%  |
| 71 | Falling forward: Real options reasoning and entrepreneurial failure                                                                           | McGrath, RG                              | 1999 | 348 | 504 | 7  | 131 | 156 | 44,83%  |

|    |                                                                                                                               |                                                |      |     |     |    |     |     |         |
|----|-------------------------------------------------------------------------------------------------------------------------------|------------------------------------------------|------|-----|-----|----|-----|-----|---------|
| 72 | Entrepreneurial orientation and small business performance: a configurational approach                                        | Wiklund, J, Shepherd, D                        | 2005 | 346 | 757 | 21 | 255 | 411 | 118,79% |
| 73 | Policy entrepreneurs and the diffusion of innovation                                                                          | Mintrom, M                                     | 1997 | 341 | 492 | 8  | 131 | 151 | 44,28%  |
| 74 | Entrepreneur human-capital inputs and small business longevity                                                                | BATES, T                                       | 1990 | 341 | 470 | 1  | 53  | 129 | 37,83%  |
| 75 | Social entrepreneurship research: A source of explanation, prediction, and delight                                            | Mair, J, Marti, I                              | 2006 | 339 | 883 | 50 | 394 | 544 | 160,47% |
| 76 | Alliance management as a source of competitive advantage                                                                      | Ireland, RD, Hitt, MA, Vaidyanath, D           | 2002 | 339 | 543 | 12 | 242 | 204 | 60,18%  |
| 77 | Entrepreneurs perceived chances for success                                                                                   | Cooper, AC, WOO, CY, DUNKELBERG, WC            | 1988 | 336 | 462 | 6  | 71  | 126 | 37,50%  |
| 78 | Guest editors' introduction to the special issue - Strategic entrepreneurship: Entrepreneurial strategies for wealth creation | Ireland, RD, Hitt, MA, Camp, SM, Sexton, DL    | 2001 | 334 | 548 | 13 | 291 | 214 | 64,07%  |
| 79 | Network ties, reputation, and the financing of new ventures                                                                   | Shane, S, Cable, D                             | 2002 | 333 | 560 | 19 | 290 | 227 | 68,17%  |
| 80 | Venture capital and the structure of capital markets: banks versus stock markets                                              | Black, BS, Gilson, RJ                          | 1998 | 333 | 471 | 11 | 107 | 138 | 41,44%  |
| 81 | Risk-taking propensity of entrepreneurs                                                                                       | BROCKHAUS, RH                                  | 1980 | 331 | 541 | 5  | 82  | 210 | 63,44%  |
| 82 | Opportunities and entrepreneurship                                                                                            | Shane, S, Eckhardt, JT                         | 2003 | 330 | 582 | 13 | 225 | 252 | 76,36%  |
| 83 | Beyond survival: Achieving new venture growth by building legitimacy                                                          | Zimmerman, MA, Zeitz, GJ                       | 2002 | 326 | 591 | 8  | 198 | 265 | 81,29%  |
| 84 | Differentiating entrepreneurs from small business owners - a conceptualization                                                | CARLAND, JW, HOY, F, BOULTON, WR, CARLAND, JAC | 1984 | 324 | 516 | 6  | 66  | 192 | 59,26%  |

|    |                                                                                                                            |                                   |      |     |     |    |     |     |         |
|----|----------------------------------------------------------------------------------------------------------------------------|-----------------------------------|------|-----|-----|----|-----|-----|---------|
| 85 | The incumbent's curse? Incumbency, size, and radical product innovation                                                    | Chandy, RK, Tellis, GJ            | 2000 | 322 | 481 | 18 | 154 | 159 | 49,38%  |
| 86 | Management fashion: Lifecycles, triggers, and collective learning processes                                                | Abrahamson, E, Fairchild, G       | 1999 | 322 | 435 | 4  | 124 | 113 | 35,09%  |
| 87 | Implementing entrepreneurial ideas - the case for intention                                                                | BIRD, B                           | 1988 | 320 | 646 | 5  | 126 | 326 | 101,88% |
| 88 | The effects of strategic orientations on technology- and market-based breakthrough innovations                             | Zhou, KZ, Yim, CK, Tse, DK        | 2005 | 318 | 565 | 20 | 232 | 247 | 77,67%  |
| 89 | Why do some universities generate more start-ups than others?                                                              | Shane, S, Di Gregorio, D          | 2003 | 317 | 498 | 8  | 176 | 181 | 57,10%  |
| 90 | A theory of debt based on the inalienability of human-capital                                                              | Hart, O, Moore, J                 | 1994 | 316 | 414 | 1  | 27  | 98  | 31,01%  |
| 91 | MNE competence-creating subsidiary mandates                                                                                | Cantwell, J, Mudambi, R           | 2005 | 313 | 523 | 5  | 119 | 210 | 67,09%  |
| 92 | Cognitive mechanisms in entrepreneurship: Why and when entrepreneurs think differently than other people                   | Baron, RA                         | 1998 | 308 | 493 | 13 | 223 | 185 | 60,06%  |
| 93 | Ethnicity and entrepreneurship                                                                                             | WALDINGER, R, Aldrich, HE         | 1990 | 305 | 485 | 2  | 49  | 180 | 59,02%  |
| 94 | A tale of two cities: Competing logics and practice variation in the professionalizing of mutual funds                     | Lounsbury, M                      | 2007 | 302 | 512 | 12 | 179 | 210 | 69,54%  |
| 95 | Reinventing strategies for emerging markets: beyond the transnational model                                                | London, T, Hart, SL               | 2004 | 302 | 524 | 14 | 237 | 222 | 73,51%  |
| 96 | Institutional entrepreneurship in the sponsorship of common technological standards: The case of Sun Microsystems and Java | Garud, R, Jain, S, Kumaraswamy, A | 2002 | 302 | 442 | 8  | 126 | 140 | 46,36%  |
| 97 | Network support and the success of newly founded businesses                                                                | Bruderl, J, Preisendorfer, P      | 1998 | 300 | 477 | 13 | 121 | 177 | 59,00%  |



|     |                                                                                                                                   |                                        |      |     |     |    |     |     |         |
|-----|-----------------------------------------------------------------------------------------------------------------------------------|----------------------------------------|------|-----|-----|----|-----|-----|---------|
| 98  | The pervasive effects of family on entrepreneurship: toward a family embeddedness perspective                                     | Aldrich, HE, Cliff, JE                 | 2003 | 299 | 539 | 10 | 146 | 240 | 80,27%  |
| 99  | A model of strategic entrepreneurship: The construct and its dimensions                                                           | Ireland, RD, Hitt, MA, Sirmon, DG      | 2003 | 298 | 562 | 11 | 284 | 264 | 88,59%  |
| 100 | Sticking it out - entrepreneurial survival and liquidity constraints                                                              | HOLTZEAKIN, D, JOULFAIAN, D, ROSEN, HS | 1994 | 297 | 378 | 1  | 42  | 81  | 27,27%  |
| 101 | Governance, ownership, and corporate entrepreneurship: The moderating impact of industry technological opportunities              | Zahra, SA                              | 1996 | 296 | 448 | 10 | 135 | 152 | 51,35%  |
| 102 | Corporate entrepreneurship and strategic management - insights from a process study                                               | BURGELMAN, RA                          | 1983 | 296 | 424 | 8  | 137 | 128 | 43,24%  |
| 103 | The norms of entrepreneurial science: cognitive effects of the new university-industry linkages                                   | Etzkowitz, H                           | 1998 | 294 | 470 | 10 | 136 | 176 | 59,86%  |
| 104 | Innovativeness: Its antecedents and impact on business performance                                                                | Knight, GA, Hult, GTM, Hurley, RF      | 2004 | 292 | 623 | 10 | 188 | 331 | 113,36% |
| 105 | The social structure of entrepreneurial activity: Geographic concentration of footwear production in the United States, 1940-1989 | Sorenson, O, Audia, PG                 | 2000 | 292 | 378 | 1  | 44  | 86  | 29,45%  |
| 106 | Entrepreneurship in multinational corporations: The characteristics of subsidiary initiatives                                     | Birkinshaw, J                          | 1997 | 291 | 432 | 3  | 122 | 141 | 48,45%  |
| 107 | Connect and develop: Inside Procter & Gamble's new model for innovation                                                           | Huston, L, Sakkab, N                   | 2006 | 289 | 422 | 10 | 145 | 133 | 46,02%  |
| 108 | Defining international entrepreneurship and modeling the                                                                          | McDougall, PP, Oviatt, BM              | 2005 | 289 | 584 | 17 | 239 | 295 | 102,08% |

speed of  
internationalization

|     |                                                                                                          |                                                                                            |      |     |     |    |     |     |         |
|-----|----------------------------------------------------------------------------------------------------------|--------------------------------------------------------------------------------------------|------|-----|-----|----|-----|-----|---------|
| 109 | When innovations meet institutions: Edison and the design of the electric light                          | Hargadon, AB, Douglas, Y                                                                   | 2001 | 288 | 446 | 10 | 168 | 158 | 54,86%  |
| 110 | Social skill and institutional theory                                                                    | Fligstein, N                                                                               | 1997 | 288 | 441 | 4  | 96  | 153 | 53,13%  |
| 111 | University entrepreneurship: a taxonomy of the literature                                                | Rothaermel, FT, Agung, SD, Jiang, L                                                        | 2007 | 287 | 536 | 31 | 438 | 249 | 86,76%  |
| 112 | The product market and the market for "ideas": commercialization strategies for technology entrepreneurs | Gans, JS, Stern, S                                                                         | 2003 | 287 | 437 | 11 | 213 | 150 | 52,26%  |
| 113 | Incumbent's advantage through exploiting complementary assets via interfirm cooperation                  | Rothaermel, FT                                                                             | 2001 | 287 | 410 | 10 | 143 | 123 | 42,86%  |
| 114 | Entrepreneurship and the concept of fit - a model and empirical tests                                    | NAMAN, JL, SLEVIN, DP                                                                      | 1993 | 287 | 456 | 3  | 120 | 169 | 58,89%  |
| 115 | Discovery and creation: alternative theories of entrepreneurial action                                   | Barney, JB, Alvarez, SA                                                                    | 2007 | 285 | 540 | 19 | 333 | 255 | 89,47%  |
| 116 | Global Entrepreneurship Monitor: Data collection design and implementation 1998-2003                     | Autio, E, Reynolds, P, Bosma, N, Hunt, S, De Bono, N, Servais, I, Lopez-Garcia, P, Chin, N | 2005 | 284 | 529 | 3  | 78  | 245 | 86,27%  |
| 117 | Why business models matter                                                                               | Magretta, J                                                                                | 2002 | 283 | 615 | 21 | 377 | 332 | 117,31% |
| 118 | A multidimensional model of venture growth                                                               | Baum, JR, Locke, EA, Smith, KG                                                             | 2001 | 280 | 517 | 9  | 117 | 237 | 84,64%  |
| 119 | Who is selling the Ivory Tower? Sources of growth in university licensing                                | Thursby, JG, Thursby, MC                                                                   | 2002 | 279 | 361 | 2  | 78  | 82  | 29,39%  |
| 120 | Credit and efficiency in centralized and decentralized economies                                         | DEWATRIPONT, M, MASKIN, E                                                                  | 1995 | 279 | 336 | 4  | 36  | 57  | 20,43%  |

|     |                                                                                                       |                                                                             |      |     |     |    |     |     |         |
|-----|-------------------------------------------------------------------------------------------------------|-----------------------------------------------------------------------------|------|-----|-----|----|-----|-----|---------|
| 121 | The entrepreneur's business model: toward a unified perspective                                       | Morris, M, Schindehutte, M, Allen, J                                        | 2005 | 278 | 598 | 28 | 367 | 320 | 115,11% |
| 122 | Reversing the gun sights: Transnational civil society targets land mines                              | Price, R                                                                    | 1998 | 274 | 411 | 1  | 38  | 137 | 50,00%  |
| 123 | The mediating role of self-efficacy in the development of entrepreneurial intentions                  | Zhao, H, Seibert, SE, Hills, GE                                             | 2005 | 270 | 621 | 31 | 409 | 351 | 130,00% |
| 124 | Personal initiative: An active performance concept for work in the 21st century                       | Frese, M, Fay, D                                                            | 2001 | 269 | 470 | 12 | 189 | 201 | 74,72%  |
| 125 | Availability cascades and risk regulation                                                             | Kuran, T, Sunstein, CR                                                      | 1999 | 268 | 338 | 2  | 28  | 70  | 26,12%  |
| 126 | Arriving at the high-growth firm                                                                      | Davidsson, P, Delmar, F, Gartner, WB                                        | 2003 | 266 | 473 | 11 | 122 | 207 | 77,82%  |
| 127 | Entrepreneurship research in emergence: Past trends and future directions                             | Busenitz, LW, Shepherd, D, West, GP, Nelson, T, Chandler, GN, Zacharakis, A | 2003 | 266 | 401 | 23 | 210 | 135 | 50,75%  |
| 128 | Building firm-specific advantages in multinational corporations: The role of subsidiary initiative    | Birkinshaw, J, Hood, N, Jonsson, S                                          | 1998 | 265 | 381 | 2  | 95  | 116 | 43,77%  |
| 129 | Research groups as 'quasi-firms': the invention of the entrepreneurial university                     | Etzkowitz, H                                                                | 2003 | 264 | 522 | 14 | 199 | 258 | 97,73%  |
| 130 | Entrepreneurial strategy making and firm performance: Tests of contingency and configurational models | Lumpkin, GT, Dess, GG, Covin, JG                                            | 1997 | 263 | 419 | 1  | 97  | 156 | 59,32%  |
| 131 | Transnational entrepreneurs: An alternative form of immigrant economic adaptation                     | Portes, A, Haller, WJ, Guarnizo, LE                                         | 2002 | 262 | 428 | 10 | 105 | 166 | 63,36%  |
| 132 | Dodging the grabbing hand: the determinants of unofficial activity in 69 countries                    | Friedman, E, Johnson, S, Kaufmann, D, Zoido-Lobaton, P                      | 2000 | 262 | 384 | 0  | 35  | 122 | 46,56%  |

|     |                                                                                                                       |                                             |      |     |     |     |     |     |         |
|-----|-----------------------------------------------------------------------------------------------------------------------|---------------------------------------------|------|-----|-----|-----|-----|-----|---------|
| 133 | The geography of opportunity: spatial heterogeneity in founding rates and the performance of biotechnology firms      | Stuart, T, Sorenson, O                      | 2003 | 260 | 361 | 9   | 109 | 101 | 38,85%  |
| 134 | Predictors and financial outcomes of corporate entrepreneurship - an exploratory-study                                | Zahra, SA                                   | 1991 | 260 | 470 | 13  | 142 | 210 | 80,77%  |
| 135 | Business groups in emerging economies: A resource-based view                                                          | Guillen, MF                                 | 2000 | 259 | 390 | 1   | 60  | 131 | 50,58%  |
| 136 | Entrepreneurial Orientation and Business Performance: An Assessment of Past Research and Suggestions for the Future   | Lumpkin, GT, Wiklund, J, Frese, M, Rauch, A | 2009 | 258 | 669 | 28  | 350 | 411 | 159,30% |
| 137 | The Business Model: Recent Developments and Future Research                                                           | Amit, R, Zott, C, Massa, L                  | 2011 | 256 | 815 | 106 | 978 | 559 | 218,36% |
| 138 | Environment, corporate entrepreneurship, and financial performance - a taxonomic approach                             | Zahra, SA                                   | 1993 | 256 | 420 | 5   | 110 | 164 | 64,06%  |
| 139 | Cultural entrepreneurship in 19th-century boston - the creation of an organizational base for high culture in america | DiMaggio, P                                 | 1982 | 254 | 337 | 1   | 36  | 83  | 32,68%  |
| 140 | The relationship of entrepreneurial traits, skill, and motivation to subsequent venture growth                        | Baum, JR, Locke, EA                         | 2004 | 252 | 507 | 19  | 319 | 255 | 101,19% |
| 141 | Personal initiative at work: Differences between East and West Germany                                                | Frese, M, Kring, W, Soose, A, Zempel, J     | 1996 | 250 | 335 | 8   | 162 | 85  | 34,00%  |
| 142 | Enviropreneurial marketing strategy: The emergence of corporate environmentalism as market strategy                   | Menon, A                                    | 1997 | 249 | 402 | 4   | 74  | 153 | 61,45%  |

|     |                                                                                                                        |                                     |      |     |     |    |     |     |         |
|-----|------------------------------------------------------------------------------------------------------------------------|-------------------------------------|------|-----|-----|----|-----|-----|---------|
| 143 | The phenomenon of early internationalizing firms: what do we know after a decade (1993-2003) of scientific inquiry?    | Knight, GA, Rialp, A, Rialp, J      | 2005 | 247 | 458 | 3  | 112 | 211 | 85,43%  |
| 144 | The structure of founding teams: Homophily, strong ties, and isolation among US entrepreneur                           | Aldrich, HE, Ruef, M, Carter, NM    | 2003 | 247 | 409 | 5  | 94  | 162 | 65,59%  |
| 145 | The psychological basis of opportunity identification: Entrepreneurial alertness                                       | Gaglio, CM, Katz, JA                | 2001 | 247 | 437 | 7  | 96  | 190 | 76,92%  |
| 146 | Immigrant self-employment: The family as social capital and the value of human capital                                 | Sanders, JM, Nee, V                 | 1996 | 247 | 356 | 18 | 109 | 109 | 44,13%  |
| 147 | Strategic alliances and the rate of new product development: An empirical study of entrepreneurial biotechnology firms | Deeds, DL, Hill, CWL                | 1996 | 246 | 347 | 7  | 96  | 101 | 41,06%  |
| 148 | Science as a map in technological search                                                                               | Sorenson, O, Fleming, L             | 2004 | 245 | 397 | 7  | 148 | 152 | 62,04%  |
| 149 | How Actors Change Institutions: Towards a Theory of Institutional Entrepreneurship                                     | Battilana, J, Leca, B, Boxenbaum, E | 2009 | 244 | 572 | 48 | 504 | 328 | 134,43% |
| 150 | Country institutional profiles: Unlocking entrepreneurial phenomena                                                    | Busenitz, LW, Gomez, C, Spencer, JW | 2000 | 243 | 440 | 10 | 88  | 197 | 81,07%  |
| 151 | Toward a general-theory of competitive rationality                                                                     | DICKSON, PR                         | 1992 | 242 | 314 | 2  | 34  | 72  | 29,75%  |
| 152 | Personal and extended networks are central to the entrepreneurial process                                              | Aldrich, HE, DUBINI, P              | 1991 | 242 | 394 | 5  | 53  | 152 | 62,81%  |
| 153 | Psychological characteristics associated with performance in entrepreneurial firms and smaller businesses              | BEGLEY, TM, BOYD, DP                | 1987 | 241 | 373 | 0  | 71  | 132 | 54,77%  |
| 154 | Entrepreneurship in economic theory                                                                                    | BAUMOL, WJ                          | 1968 | 240 | 358 | 0  | 38  | 118 | 49,17%  |

|     |                                                                                                                                        |                                                                  |      |     |     |    |     |     |         |
|-----|----------------------------------------------------------------------------------------------------------------------------------------|------------------------------------------------------------------|------|-----|-----|----|-----|-----|---------|
| 155 | Social networks and entrepreneurship                                                                                                   | Greve, A, Salaff, JW                                             | 2003 | 239 | 500 | 17 | 176 | 261 | 109,21% |
| 156 | What do entrepreneurs pay for venture capital affiliation?                                                                             | Hsu, DH                                                          | 2004 | 237 | 361 | 8  | 103 | 124 | 52,32%  |
| 157 | Socially responsible organizational buying - environmental concern as a noneconomic buying criterion                                   | DRUMWRIGHT, ME                                                   | 1994 | 237 | 365 | 6  | 72  | 128 | 54,01%  |
| 158 | Corporate entrepreneurship - introduction                                                                                              | Guth, WD, Ginsberg, A                                            | 1990 | 237 | 387 | 6  | 79  | 150 | 63,29%  |
| 159 | Institutional emergence in an era of globalization: The rise of transnational private regulation of labor and environmental conditions | Bartley, T                                                       | 2007 | 236 | 419 | 5  | 114 | 183 | 77,54%  |
| 160 | The internationalization of new and small firms: A resource-based view                                                                 | Westhead, P, Wright, M, Ucbasaran, D                             | 2001 | 236 | 428 | 14 | 235 | 192 | 81,36%  |
| 161 | Internationalisation: conceptualising an entrepreneurial process of behaviour in time                                                  | Jones, MV, Coviello, NE                                          | 2005 | 233 | 413 | 16 | 212 | 180 | 77,25%  |
| 162 | Knowledge transfer through inheritance: Spinout generation, development, and survival                                                  | Agarwal, R, Echambadi, R, Franco, AM, Sarkar, MB                 | 2004 | 232 | 340 | 6  | 118 | 108 | 46,55%  |
| 163 | Does market orientation matter?: A test of the relationship between positional advantage and performance                               | Hult, GTM, Ketchen, DJ                                           | 2001 | 231 | 397 | 8  | 73  | 166 | 71,86%  |
| 164 | The New Public Service: Serving rather than steering                                                                                   | Denhardt, RB, Denhardt, JV                                       | 2000 | 231 | 410 | 10 | 137 | 179 | 77,49%  |
| 165 | Institutional Complexity and Organizational Responses                                                                                  | Greenwood, R, Lounsbury, M, Raynard, M, Kodeih, F, Micelotta, ER | 2011 | 230 | 612 | 38 | 470 | 382 | 166,09% |
| 166 | Critical junctures in the development of university high-tech spinout companies                                                        | Wright, M, Vohora, A, Lockett, A                                 | 2004 | 229 | 389 | 11 | 131 | 160 | 69,87%  |

|     |                                                                                                                                    |                                                        |      |     |     |    |     |     |        |
|-----|------------------------------------------------------------------------------------------------------------------------------------|--------------------------------------------------------|------|-----|-----|----|-----|-----|--------|
| 167 | Organizational improvisation and learning: A field study                                                                           | Miner, AS, Bassoff, P, Moorman, C                      | 2001 | 229 | 316 | 4  | 131 | 87  | 37,99% |
| 168 | Economic development as self-discovery                                                                                             | Hausmann, R, Rodrik, D                                 | 2003 | 228 | 382 | 3  | 52  | 154 | 67,54% |
| 169 | Probing theoretically into Central and Eastern Europe: transactions, resources, and institutions                                   | Peng, MW, Meyer, KE                                    | 2005 | 227 | 353 | 19 | 136 | 126 | 55,51% |
| 170 | The emergence of a market society: Changing mechanisms of stratification in China                                                  | Nee, V                                                 | 1996 | 227 | 278 | 3  | 42  | 51  | 22,47% |
| 171 | Which ties matter when? The contingent effects of interorganizational partnerships on IPO success                                  | Gulati, R, Higgins, MC                                 | 2003 | 226 | 329 | 3  | 134 | 103 | 45,58% |
| 172 | Cognitive, biases, risk perception and venture formation: How individuals decide to start companies                                | Simon, M, Houghton, SM, Aquino, K                      | 2000 | 225 | 384 | 8  | 174 | 159 | 70,67% |
| 173 | On the evolution of the firm size distribution: Facts and theory                                                                   | Cabral, LMB, Mata, J                                   | 2003 | 224 | 316 | 3  | 42  | 92  | 41,07% |
| 174 | Opportunity recognition as the detection of meaningful patterns: Evidence from comparisons of novice and experienced entrepreneurs | Baron, RA, Ensley, MD                                  | 2006 | 223 | 405 | 21 | 221 | 182 | 81,61% |
| 175 | The determinants of regional variation in new firm formation                                                                       | Armington, C, Acs, ZJ                                  | 2002 | 223 | 326 | 6  | 69  | 103 | 46,19% |
| 176 | Entry regulation as a barrier to entrepreneurship                                                                                  | Klapper, L, Laeven, L, Rajan, R                        | 2006 | 220 | 369 | 7  | 100 | 149 | 67,73% |
| 177 | Cross-cultural cognitions and the venture creation decision                                                                        | Mitchell, RK, Smith, B, Seawright, KW, Morse, EA       | 2000 | 220 | 326 | 8  | 84  | 106 | 48,18% |
| 178 | Work and family variables, entrepreneurial career success, and psychological well-being                                            | Parasuraman, S, Purohit, YS, Godshalk, VM, Beutell, NJ | 1996 | 219 | 315 | 3  | 105 | 96  | 43,84% |

|     |                                                                                                               |                                                 |      |     |     |    |     |     |         |
|-----|---------------------------------------------------------------------------------------------------------------|-------------------------------------------------|------|-----|-----|----|-----|-----|---------|
| 179 | Entrepreneurship                                                                                              | Lazear, EP                                      | 2005 | 217 | 356 | 2  | 96  | 139 | 64,06%  |
| 180 | The concept of personal initiative: Operationalization, reliability and validity in two German samples        | Frese, M, Fay, D, Hilburger, T, Leng, K, Tag, A | 1997 | 217 | 317 | 9  | 89  | 100 | 46,08%  |
| 181 | Liquidity constraints, household wealth, and entrepreneurship                                                 | Hurst, E, Lusardi, A                            | 2004 | 216 | 315 | 5  | 42  | 99  | 45,83%  |
| 182 | Investor protection and equity markets                                                                        | Shleifer, A, Wolfenzon, D                       | 2002 | 215 | 299 | 3  | 42  | 84  | 39,07%  |
| 183 | Industrial organization and entrepreneurship in developing-countries - economic groups                        | Leff, NH                                        | 1978 | 215 | 280 | 2  | 5   | 65  | 30,23%  |
| 184 | Optimal standardization in the law of property: The numerus clausus principle                                 | Merrill, TW, Smith, HE                          | 2000 | 214 | 297 | 3  | 33  | 83  | 38,79%  |
| 185 | The Sarbanes-Oxley Act and the making of quack corporate governance                                           | Romano, R                                       | 2005 | 213 | 301 | 7  | 69  | 88  | 41,31%  |
| 186 | Exploring start-up event sequences                                                                            | Reynolds, P, Gartner, WB, Carter, NM            | 1996 | 213 | 323 | 8  | 191 | 110 | 51,64%  |
| 187 | Relational archetypes, organizational learning, and value creation: Extending the human resource architecture | Kang, SC, Morris, SS, Snell, SA                 | 2007 | 212 | 341 | 6  | 155 | 129 | 60,85%  |
| 188 | The sociology of entrepreneurship                                                                             | Thornton, PH                                    | 1999 | 212 | 314 | 7  | 136 | 102 | 48,11%  |
| 189 | The emergence of entrepreneurship education: Development, trends, and challenges                              | Kuratko, DF                                     | 2005 | 210 | 589 | 40 | 271 | 379 | 180,48% |
| 190 | The resource-based view and international business                                                            | Peng, MW                                        | 2001 | 210 | 339 | 14 | 163 | 129 | 61,43%  |
| 191 | A theory of international new ventures: a decade of research                                                  | Zahra, SA                                       | 2005 | 209 | 367 | 3  | 142 | 158 | 75,60%  |
| 192 | The effects of entrepreneurial proclivity and market orientation on business performance                      | Matsuno, K, Mentzer, JT, Ozsomer, A             | 2002 | 209 | 361 | 4  | 91  | 152 | 72,73%  |



|     |                                                                                                             |                                                            |      |     |     |    |     |     |         |
|-----|-------------------------------------------------------------------------------------------------------------|------------------------------------------------------------|------|-----|-----|----|-----|-----|---------|
| 193 | The returns to entrepreneurial investment: A private equity premium puzzle?                                 | Moskowitz, TJ, Vissing-Jorgensen, A                        | 2002 | 208 | 303 | 5  | 29  | 95  | 45,67%  |
| 194 | Portfolio choice and asset prices: The importance of entrepreneurial risk                                   | Heaton, J, Lucas, D                                        | 2000 | 208 | 270 | 0  | 28  | 62  | 29,81%  |
| 195 | Default and renegotiation: A dynamic model of debt                                                          | Hart, O, Moore, J                                          | 1998 | 207 | 250 | 1  | 33  | 43  | 20,77%  |
| 196 | Neoliberalism, higher education and the knowledge economy: from the free market to knowledge capitalism     | Olssen, M, Peters, MA                                      | 2005 | 206 | 550 | 26 | 245 | 344 | 166,99% |
| 197 | Managing the Rivalry of Competing Institutional Logics                                                      | Reay, T, Hinings, CR                                       | 2009 | 204 | 467 | 14 | 168 | 263 | 128,92% |
| 198 | Identity construction: New issues, new directions                                                           | Cerulo, KA                                                 | 1997 | 204 | 304 | 10 | 114 | 100 | 49,02%  |
| 199 | Slack resources and the performance of privately held firms                                                 | George, G                                                  | 2005 | 203 | 342 | 13 | 129 | 139 | 68,47%  |
| 200 | Tracking strategy in an entrepreneurial firm                                                                | Mintzberg, H, Waters, Ja                                   | 1982 | 203 | 269 | 1  | 35  | 66  | 32,51%  |
| 201 | Property rights and finance                                                                                 | Johnson, S, McMillan, J, Woodruff, C                       | 2002 | 201 | 284 | 1  | 33  | 83  | 41,29%  |
| 202 | The exploration of technological diversity and the geographic localization of innovation                    | Almeida, P, Kogut, B                                       | 1997 | 201 | 251 | 4  | 63  | 50  | 24,88%  |
| 203 | The role of affect in the entrepreneurial process                                                           | Baron, RA                                                  | 2008 | 200 | 290 | 12 | 191 | 90  | 45,00%  |
| 204 | The cognitive perspective: a valuable tool for answering entrepreneurship's basic "why" questions           | Baron, RA                                                  | 2004 | 200 | 354 | 4  | 124 | 154 | 77,00%  |
| 205 | The institutional effects on strategic alliance partner selection in transition economies: China vs. Russia | Hitt, MA, Ahlstrom, D, Dacin, AT, Levitas, E, Svobodina, L | 2004 | 200 | 302 | 5  | 117 | 102 | 51,00%  |
